# Supplementary material
Source: PubMed Central journal article supplement (PMC3896204)
Supplement: 1307264111_pnas.201307264SI.pdf [file 1307264111_pnas.201307264SI.pdf]

# Supporting Information

Brand et al. 10.1073/pnas.1307264111

## SI Materials and Methods

**Generation of Strain Cdc24<sup>Pb1</sup>.** The ORF encoding Cdc24, the guanine exchange factor for the small GTPase, Cdc42, and 200-bp of its downstream sequence was amplified by PCR from clinical isolate SC5314 using primers CDC24-Amp-ORF-Not1-F2 and CDC24-Amp-ORF-Xba1-R2 (Table S2). The 500-bp region downstream of the Cdc24 stop codon was amplified using primers CDC24-Amp-Term-Sal1-F and CDC24-Amp-term-Kpn1-R. The PCR products were subcloned into TOPO plasmids (Invitrogen) to generate ABp26 and ABp33 (Table S3). The plasmids were digested with NotI/XbaI or SalI/KpnI and the Cdc24 upstream and downstream regions, respectively, were sequentially ligated either side of the *URA3* gene encoding Orotidine-5'-phosphate decarboxylase as a selectable marker, in plasmid pBS-*URA3*, a gift from Carol Munro (University of Aberdeen, Aberdeen, UK), to generate plasmid ABp63, then ABp71. Two rounds of site-directed mutagenesis were carried out to introduce point mutations D802A, D806A, and D813A into the PB1 C-terminal domain of Cdc24 and generate plasmid ABp99. Correct insertion was confirmed by PCR and by sequencing with primers URA3-R2, URA3-R3, URA3-OK-F2, Cdc24-Seq-Up-F, and Cdc24-Seq-Down-F. The CDC24-200t-*URA3*-500t construct was excised from ABp99 by digestion with NotI/KpnI and transformed into *Candida albicans* THE1 (1), to replace one *CDC24* allele and generate strain AB299. The Ura-minus strain, AB310, was generated by 5-FOA plating to select for loss of *URA3*. The tetracycline-regulatable promoter (Tet-Off) was PCR-amplified from plasmid CAU1-99 (2) using primers CDC24-Long-Tet-F and CDC24-Long-Tet-R and transformed into strain AB310 to generate strain AB320. PCR analysis, Southern analysis (primers Cdc24-Seq-Up-F and Cdc24-Probe-R), and sequencing were used to select for and confirm insertion of the Tet promoter in front of the wild-type *CDC24* allele and insertion of the mutated allele behind the wild-type promoter in strain Cdc24<sup>Pb1</sup>.

**Cell-Wall Composition Analysis.** Cell walls were extracted as described previously (3). The hydrolyzed samples were analyzed by high-performance anion-exchange chromatography with pulsed amperometric detection in a carbohydrate analyzer (Dionex) as described previously (4). The total concentration of each cell wall component was expressed as micrograms per milligram of dried cell wall, determined by calibration from the standard curves of glucosamine, glucose, and mannose monomers and converted to a percentage of the total cell wall.

**Microscopy.** Galvanotropism and thigmotropism bright field images were captured using an Infinity 1 camera fitted to an Olympus BX50 light microscope. Membranes were stained with the lipophilic dye FM4-64 (Molecular Probes) for 40 min, followed by a 40-min chase in the absence of FM4-64 (5). Cell walls were stained with 100  $\mu$ g/mL Calcofluor White. Fluorescence images were captured on a DeltaVision RT microscope (Applied Precision Instruments) equipped with standard filter RD-TR-PE

(excitation, 555 nm; emission, 617 nm) and a CoolSNAP HQ camera (Photometrics). Data were recorded using the softWoRx version 3.5.0 software (Applied Precision Instruments). For transmission electron microscopy imaging, samples were subjected to high-pressure freezing with a Leica EM PACT2 (Leica Microsystems) followed by freeze-substitution in substitution reagent (1% OsO<sub>4</sub>/0.1% uranyl acetate in acetone) with a Leica EM AFS2. Samples were encapsulated in 3% (wt/vol) low-melting-point agarose before progressing to Spurr resin. Additional infiltration was provided under vacuum at 60 °C before embedding in TAAB capsules and polymerizing at 60 °C for 48 h. Ultrathin sections (60 nm) were prepared with a Diatome diamond knife on a Leica UC6 ultramicrotome and stained with uranyl acetate and lead citrate for examination with a Philips CM10 transmission microscope (FEI U.K. Ltd.) and imaging with a GatanBioscan 792 (Gatan U.K.).

**Hyphal Extension in an Electric Field.** Yeast cells were adhered to poly-L-lysine-coated microscope slides and incubated in modified Soll's medium (MSM) at pH 7.5 in a Biorad midi-sub cell electrophoresis tank at a temperature of 37 °C  $\pm$  1 °C to induce hyphae, as described previously (6). Hyphal length was measured using Improvision Openlab 2.0 software after incubation for 2 h with no electric field, followed by 3 h in an applied electric field of 10 V/cm and a current of 33  $\pm$  2 mA. The mean length  $\pm$  SD was determined from >100 measurements in a minimum of three independent experiments.

**Quantitation of Wild-Type *CDC24* mRNA by Quantitative RT-PCR.** PCR primers specific for the wild-type *CDC24* allele, the *CDC24*<sup>Pb1</sup> allele, and the housekeeping gene *ACT1* were designed using the Universal ProbeLibrary Assay Design Center (Roche) (Table S2). Strain Cdc24<sup>Pb1</sup> was grown in yeast-extract peptone dextrose (YPD, 1% wt/vol), 2% (wt/vol) mycological peptone, and 2% (wt/vol) glucose overnight at 30 °C with shaking at 200 rpm, diluted to OD<sub>600nm</sub> = 0.075 in YPD, and grown in 0, 0.125, or 20  $\mu$ g/mL doxycycline for 4 h at 30 °C with shaking. Total RNA was isolated using TRIzol reagent (Invitrogen). RNA concentration was quantified using a NanoDrop spectrophotometer (NanoDrop Technologies Inc.). Four micrograms of total RNA treated with DNase I (Invitrogen) was reverse-transcribed using SuperScript II Reverse Transcriptase (Invitrogen) with Oligo(dT) 12–18 primer (Promega). cDNA samples were checked for DNA contamination by PCR using an EFB1 primer pair that spans an intron. Real-time quantitative PCR was performed in 384-well plates using an LC480-II light cycler (F. Hoffmann–La Roche). PCR was carried out in duplicate using a LightCycler 480 Probes Mastermix (Roche): 95 °C for 10 min followed by 45 cycles of 95 °C for 10 s, 60 °C for 30 s, and 72 °C for 1 min. A melting curve analysis was performed to test for nonspecific PCR products. The efficiencies of qPCR reactions for samples were similar to the standard curve, allowing for calculation of gene expression levels normalized to the geometric mean of the results from *ACT1*.

1. Nakayama H, et al. (2000) Tetracycline-regulatable system to tightly control gene expression in the pathogenic fungus *Candida albicans*. *Infect Immun* 68(12):6712–6719.
2. Miyamoto T, et al. (2005) Tight junctions in Schwann cells of peripheral myelinated axons: A lesson from claudin-19-deficient mice. *J Cell Biol* 169(3):527–538.
3. Mora-Montes HM, et al. (2007) Endoplasmic reticulum  $\alpha$ -glycosidases of *Candida albicans* are required for *N* glycosylation, cell wall integrity, and normal host-fungus interaction. *Eukaryot Cell* 6(12):2184–2193.

4. Plaine A, et al. (2008) Functional analysis of *Candida albicans* GPI-anchored proteins: Roles in cell wall integrity and caspofungin sensitivity. *Fungal Genet Biol* 45(10):1404–1414.
5. Vida TA, Emr SD (1995) A new vital stain for visualizing vacuolar membrane dynamics and endocytosis in yeast. *J Cell Biol* 128(5):779–792.
6. Brand A, et al. (2007) Hyphal orientation of *Candida albicans* is regulated by a calcium-dependent mechanism. *Curr Biol* 17(4):347–352.

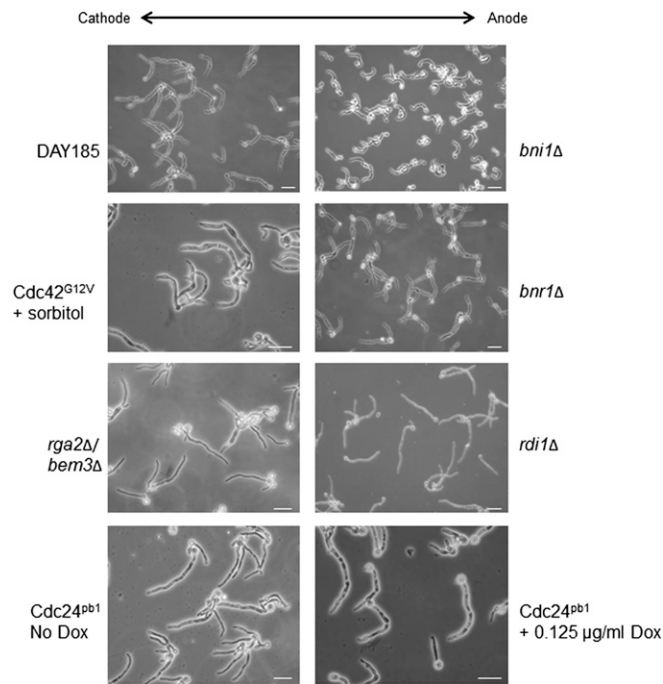

**Fig. S1.** Final reorientation angles of *C. albicans* hyphae in an applied dc electric field. Yeast cells were adhered to poly-L-lysine slides for 30 min. Slides were placed in a Biorad midi-sub cell electrophoresis tank and hyphal growth was induced by incubation at 37 °C in MSM, as described previously (1). For *CDC42* mutant strains, MSM was supplemented with 2% sorbitol to repress expression of the heterologous copy of *CDC42*. For strain *Cdc24<sup>Pb1</sup>*, cells were grown in 0.125 μg/mL doxycycline to repress the wild-type copy of *CDC24*. (Scale bars, 20 μm.)

1. Brand A, et al. (2007) Hyphal orientation of *Candida albicans* is regulated by a calcium-dependent mechanism. *Curr Biol* 17(4):347–352.

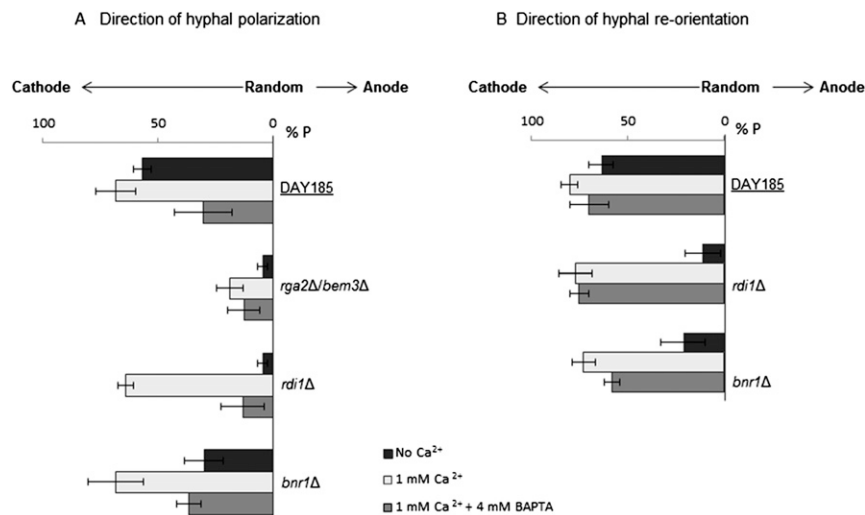

**Fig. S2.** Addition of 1 mM Ca<sup>2+</sup> rescues the loss of (A) cathodal polarization and (B) final hyphal reorientation in a dc electric field in the *rdi1Δ* and *bnr1Δ* mutant. Rescue of cathodal polarization, but not final hyphal reorientation, is reversed by the further addition of the Ca<sup>2+</sup> chelator, 1,2-bis(2-aminophenoxy) ethane-N,N,N',N'-tetraacetic acid (BAPTA) (4 mM), indicating that the two galvanotropic responses are driven by different mechanisms.

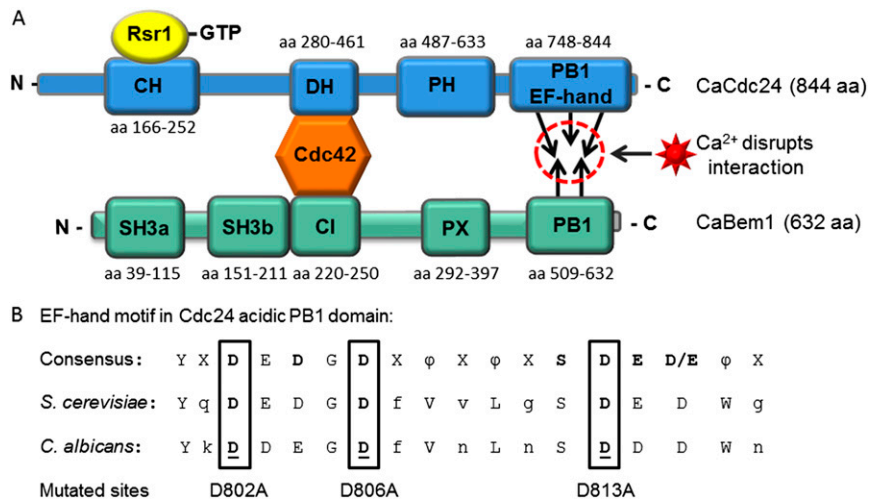

**Fig. S3.** (A) Cdc24-Cdc42-Bem1 structure and interactions. CaCdc24, the guanine exchange factor (GEF) for Cdc42, consists of the following domains: CH [Calponin Homology: ScCdc24 CH domain interacts with Rsr1-GTP and Far1 (1)], DH (Dbl Homology: ScCdc24 Rho-GEF catalytic domain that interacts with Cdc42), PH (Plekstrin Homology: ScCdc24 contains a putative  $\alpha$ -lactalbumin-like  $\text{Ca}^{2+}$ -binding site), and PB1 [Phox & Bem1 Type 1 (acidic): ScCdc24 contains an S110A-like EF-hand (2, 3) and interacts with Bem1-PB1 (4)]. This interaction is disrupted by  $\text{Ca}^{2+}$  in vitro (5). ScCdc24-PB1 binds an autoinhibitory domain at aa 673-780 (1). CaBem1 domains: SH3a [ScBem1 interacts with Sec15 (6)], SH3b [ScBem1 interacts with Bem2, Boi1, Cla4, Cst20 (7-10)], CI (Cdc42-Interacting (11, 12), PX (PxxP), and PB1 Type 2 (basic) (13). (B) Alignment of the consensus acidic PB1 domain in Cdc24 containing a putative EF-hand sequence (14, 15) in *C. albicans* and *Saccharomyces cerevisiae*, where X indicates any amino acid and  $\phi$  indicates a hydrophobic amino acid. Conserved aspartate residues D802 and D806 (the equivalents of D820 and D824 in *S. cerevisiae*) are critical for Bem1-PB1 binding (13). D802, D806, and D831 (boxed) lie at positions 1, 5, and 12 in the canonical EF-hand structure and contribute  $\text{Ca}^{2+}$  coordination (16). The amino acid residues mutated in *C. albicans* Cdc24<sup>pb1</sup> in this study are underlined and numbered.

- Shimada Y, Wiget P, Gulli MP, Bi E, Peter M (2004) The nucleotide exchange factor Cdc24p may be regulated by auto-inhibition. *EMBO J* 23(5):1051-1062.
- Miyamoto S, Ohya Y, Ohsumi Y, Anraku Y (1987) Nucleotide sequence of the *CLS4* (*CDC24*) gene of *Saccharomyces cerevisiae*. *Gene* 54(1):125-132.
- Toenjes KA, Simpson D, Johnson DI (2004) Separate membrane targeting and anchoring domains function in the localization of the *S. cerevisiae* Cdc24p guanine nucleotide exchange factor. *Curr Genet* 45(5):257-264.
- Ito T, Matsui Y, Ago T, Ota K, Sumimoto H (2001) Novel modular domain PB1 recognizes PC motif to mediate functional protein-protein interactions. *EMBO J* 20(15):3938-3946.
- Zheng Y, Bender A, Cerione RA (1995) Interactions among proteins involved in bud-site selection and bud-site assembly in *Saccharomyces cerevisiae*. *J Biol Chem* 270(2):626-630.
- France YE, Boyd C, Coleman J, Novick PJ (2006) The polarity-establishment component Bem1p interacts with the exocyst complex through the Sec15p subunit. *J Cell Sci* 119(Pt 5):876-888.
- Peterson J, et al. (1994) Interactions between the bud emergence proteins Bem1p and Bem2p and Rho-type GTPases in yeast. *J Cell Biol* 127(5):1395-1406.
- Bender L, et al. (1996) Associations among PH and SH3 domain-containing proteins and Rho-type GTPases in Yeast. *J Cell Biol* 133(4):879-894.
- Gulli MP, et al. (2000) Phosphorylation of the Cdc42 exchange factor Cdc24 by the PAK-like kinase Cla4 may regulate polarized growth in yeast. *Mol Cell* 6(5):1155-1167.
- Winters MJ, Pryciak PM (2005) Interaction with the SH3 domain protein Bem1 regulates signaling by the *Saccharomyces cerevisiae* p21-activated kinase Ste20. *Mol Cell Biol* 25(6):2177-2190.
- Yamaguchi Y, Ota K, Ito T (2007) A novel Cdc42-interacting domain of the yeast polarity establishment protein Bem1. Implications for modulation of mating pheromone signaling. *J Biol Chem* 282(1):29-38.
- Takaku T, Ogura K, Kumeta H, Yoshida N, Inagaki F (2010) Solution structure of a novel Cdc42 binding module of Bem1 and its interaction with Ste20 and Cdc42. *J Biol Chem* 285(25):19346-19353.
- Ogura K, et al. (2009) NMR structure of the heterodimer of Bem1 and Cdc24 PB1 domains from *Saccharomyces cerevisiae*. *J Biochem* 146(3):317-325.
- Terasawa H, et al. (2001) Structure and ligand recognition of the PB1 domain: A novel protein module binding to the PC motif. *EMBO J* 20(15):3947-3956.
- Nakamura R, et al. (1998) The PC motif: A novel and evolutionarily conserved sequence involved in interaction between p40phox and p67phox, SH3 domain-containing cytosolic factors of the phagocyte NADPH oxidase. *Eur J Biochem* 251(3):583-589.
- Kretsinger RH, Nockolds CE (1973) Carp muscle calcium-binding protein. II. Structure determination and general description. *J Biol Chem* 248(9):3313-3326.

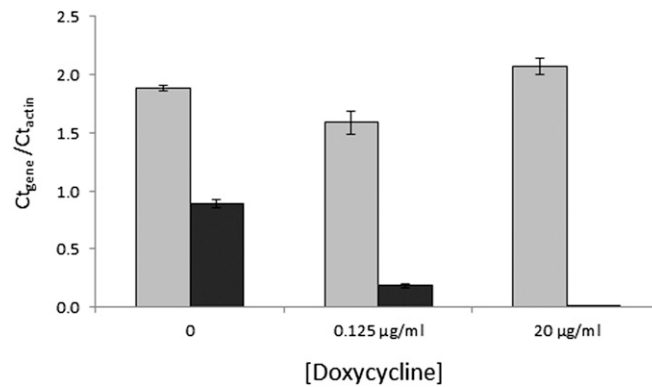

**Fig. S4.** The wild-type copy of *CDC24* is repressed by doxycycline. Strain *Cdc24<sup>Pb1</sup>* was grown for 4 h with or without doxycycline at the concentrations indicated. Doxycycline did not significantly affect expression of the mutated copy of *CDC24* from the native *CDC24* promoter. The presence of 0.125  $\mu\text{g/ml}$  doxycycline reduced expression of wild-type *CDC24*, under the control of the Tetp promoter, by fivefold. Expression was reduced 90-fold or was not detectable in the presence of 20  $\mu\text{g/ml}$  doxycycline. In the absence of doxycycline, the expression level of wild-type *CDC24* from the Tet promoter was half that of the native promoter.

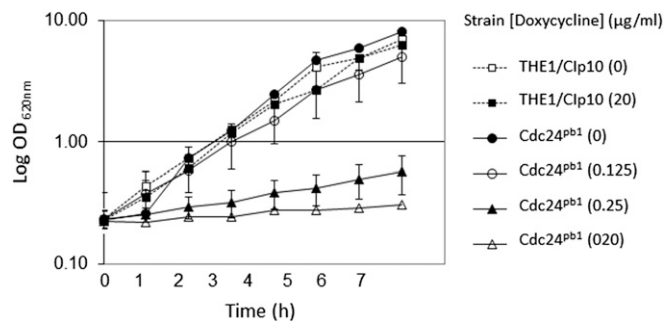

**Fig. S5.** The  $\text{Ca}^{2+}$ -binding EF-hand motif is required for growth as yeast in *C. albicans*. The control strain (THE1/Clp10) and *Cdc24<sup>Pb1</sup>* were grown overnight as yeast without or with doxycycline (0.125  $\mu\text{g/ml}$ , 0.25  $\mu\text{g/ml}$ , or 20  $\mu\text{g/ml}$ ) to repress the wild-type copy of *CDC24*. Cells were subcultured at  $\text{OD}_{600} = 0.05$  in fresh medium containing the same concentration of doxycycline and the  $\text{OD}_{600}$  was recorded over 7 h. Error bars indicate SD,  $n = 3$ .

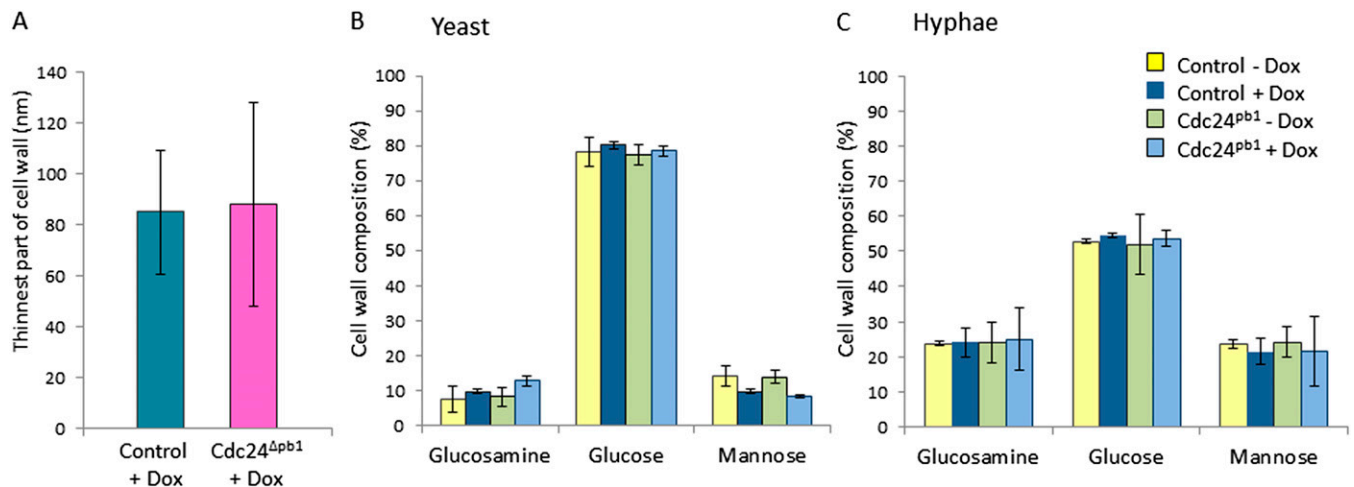

**Fig. S6.** Mutation of the *Cdc24*-PB1 domain does not alter cell-wall thickness and composition. (A) Measurement of cell-wall thickness from transmission electron microscopy images. (B and C) HPLC analysis of cell-wall polymers glucosamine (derived from chitin), glucose ( $\beta$ -glucan), and mannose (mannan) in *Cdc24<sup>Pb1</sup>* yeast and hyphae. Error bars indicate SD,  $n = 3$ .



Table S1. *C. albicans* strains used in this study

| Strain     | Alternative name                | Genotype                                                                                                                                                                         | Source     |
|------------|---------------------------------|----------------------------------------------------------------------------------------------------------------------------------------------------------------------------------|------------|
| SC5314     |                                 | Clinical isolate                                                                                                                                                                 | 1          |
| NGY152     | CAI4/Clp10                      | <i>ura3Δ-iro1Δ::λimm434/ura3Δ-iro1Δ::λimm434 RPS1/rps1-Clp10-URA3</i>                                                                                                            | 2, 3       |
| SU64       | Cdc42 <sup>G12V</sup>           | <i>ura3Δ-iro1Δ::λimm434/ura3Δ-iro1Δ::λimm434, CDC42/cdc42::hisG, PCK1-CDC42<sup>G12V</sup>::hisG-URA3-hisG</i>                                                                   | 4          |
| SU69       | Cdc42 <sup>D118A</sup>          | <i>ura3Δ-iro1Δ::λimm434/ura3Δ-iro1Δ::λimm434, CDC42/cdc42::hisG, PCK1-CaCDC42<sup>D118A</sup>::hisG-URA3-hisG</i>                                                                | 4          |
| SU84       | Cdc42 O/E                       | <i>ura3Δ-iro1Δ::λimm434/ura3Δ-iro1Δ::λimm434, CDC42/cdc42::hisG, PCK1-CaCDC42::hisG-URA3-hisG</i>                                                                                | 4          |
| 609        | <i>rga2Δ</i>                    | <i>ura3Δ-iro1Δ::λimm434/ura3Δ-iro1Δ::λimm434 his1::hisG/his1::hisG arg4::hisG/larg4::hisG rga2Δ::HIS1/rga2Δ::ARG4RPS1/rps1-pCAEXP-pMET3-URA3</i>                                 | 5          |
| 611        | <i>bem3Δ</i>                    | <i>ura3Δ-iro1Δ::λimm434/ura3Δ-iro1Δ::λimm434 his1::hisG/his1::hisG arg4::hisG/larg4::hisG bem3Δ::HIS1/bem3Δ::ARG4RPS1/rps1-pCAEXP-pMET3-URA3</i>                                 | 5          |
| 615        | <i>rga2Δ/bem3Δ</i>              | <i>ura3Δ-iro1Δ::λimm434/ura3Δ-iro1Δ::λimm434 his1::hisG/his1::hisG arg4::hisG/larg4::hisG rga2Δ::HIS1/rga2Δ::ARG4bem3::ura3(5'Δ)/bem3::ura3(5'Δ) RPS1/rps1-pCAEXP-pMET3-URA3</i> | 5          |
| 612        | <i>rdi1Δ</i>                    | <i>ura3Δ-iro1Δ::λimm434/ura3Δ-iro1Δ::λimm434 his1::hisG/his1::hisG arg4::hisG/larg4::hisG rdi1Δ::HIS1/rdi1Δ::ARG4 RPS1/rps1-Clp10-URA3</i>                                       | 5          |
| THE1       |                                 | <i>ade2Δ::hisG/lade2Δ::hisG ura3Δ::λimm434/ura3Δ::λimm434, ENO1/eno1Δ::ENO1-tetR-ScHAP4AD-3xHA-ADE2</i>                                                                          | 6          |
| THE1/Clp10 |                                 | THE1 <i>RP10/RP10::URA3</i>                                                                                                                                                      | 7          |
| PY95       | <i>CDC24/cdc24</i>              | <i>ura3Δ-iro1Δ::λimm434/ura3Δ-iro1Δ::λimm434 his1::hisG/his1::hisG arg4::hisG/larg4::hisG CDC24/cdc24Δ::HIS1</i>                                                                 | 8          |
| WYL3       | <i>bni1Δ</i>                    | <i>ura3Δ::λimm434/ura3Δ::λimm434 his1::hisG/his1::hisG arg4::hisG/larg4::hisG bni1::ARG/ bni1::HIS, URA3</i>                                                                     | 9          |
| WYL22      | <i>bnr1Δ</i>                    | <i>ura3Δ::λimm434/ura3Δ::λimm434 his1::hisG/his1::hisG arg4::hisG/larg4::hisG bnr1::ARG/ bnr1::HIS</i>                                                                           | 9          |
| DAY185     |                                 | <i>ura3Δ::λimm434/ura3Δ::λimm434 his1::hisG/HIS1::his1::hisG arg4::hisG/ARG4::URA3::arg4::hisG</i>                                                                               | 10         |
| AB299      | THE1-Cdc24 <sup>pb1</sup> -URA3 | THE1 <i>CDC24/cdc24<sup>Δpb1</sup>-URA3</i>                                                                                                                                      | This study |
| AB310      | THE1-Cdc24 <sup>pb1</sup>       | THE1 <i>CDC24/cdc24<sup>Δpb1</sup></i>                                                                                                                                           | This study |
| AB320      | Cdc24 <sup>pb1</sup>            | THE1 <i>URA3-Tetp- CDC24/cdc24<sup>Δpb1</sup></i>                                                                                                                                | This study |

- Gillum AM, Tsay EYH, Kirsch DR (1984) Isolation of the *Candida albicans* gene for orotidine-5'-phosphate decarboxylase by complementation of *S. cerevisiae ura3*; and *E. coli pyrF* mutations. *Mol Gen Genet* 198(1):179–182.
- Murad AM, Lee PR, Broadbent ID, Barelle CJ, Brown AJ (2000) Clp10, an efficient and convenient integrating vector for *Candida albicans*. *Yeast* 16(4):325–327.
- Brand A, MacCallum DM, Brown AJP, Gow NAR, Odds FC (2004) Ectopic expression of *URA3* can influence the virulence phenotypes and proteome of *Candida albicans* but can be overcome by targeted reintegration of *URA3* at the *RPS10* locus. *Eukaryot Cell* 3(4):900–909.
- Ushinsky SC, et al. (2002) *CDC42* is required for polarized growth in human pathogen *Candida albicans*. *Eukaryot Cell* 1(1):95–104.
- Court H, Sudbery P (2007) Regulation of Cdc42 GTPase activity in the formation of hyphae in *Candida albicans*. *Mol Biol Cell* 18(1):265–281.
- Nakayama H, et al. (2000) Tetracycline-regulatable system to tightly control gene expression in the pathogenic fungus *Candida albicans*. *Infect Immun* 68(12):6712–6719.
- Bernardo SM, Khalique Z, Kot J, Jones JK, Lee SA (2008) *Candida albicans VPS1* contributes to protease secretion, filamentation, and biofilm formation. *Fungal Genet Biol* 45(6):861–877.
- Bassilana M, Blyth J, Arkowitz RA (2003) Cdc24, the GDP-GTP exchange factor for Cdc42, is required for invasive hyphal growth of *Candida albicans*. *Eukaryot Cell* 2(1):9–18.
- Li CR, et al. (2005) The formin family protein CaBni1p has a role in cell polarity control during both yeast and hyphal growth in *Candida albicans*. *J Cell Sci* 118(Pt 12):2637–2648.
- Davis D, Edwards JE, Jr, Mitchell AP, Ibrahim AS (2000) *Candida albicans RIM101* pH response pathway is required for host-pathogen interactions. *Infect Immun* 68(10):5953–5959.



**Table S2. Primers used in this study**

| Primer name                  | Primer sequence                                                                                                                                                     |
|------------------------------|---------------------------------------------------------------------------------------------------------------------------------------------------------------------|
| Cdc24-Amp-ORF-Not1-F2        | 5'-ctactactaGCGGCCGcatggaacatccaccagcagctctc-3'*                                                                                                                    |
| CDC24—Amp-ORF-Xba11-R2       | 5'-gatgatTCTAGAtatttcgtcaaaatgctatttatatc-3'*                                                                                                                       |
| CDC24-Amp-term-Sall-F        | 5'-cacaGTCGACTttaactacaggaacaacgc-3'*                                                                                                                               |
| CDC24-Amp-term-KpnI-R        | 5'-aaaaGGTACCgcaatggcttgatggtttgagc-3'*                                                                                                                             |
| CDC24-Long-Tet-F             | 5'cagcttgagtttactagtttgccacctggttgcccacttagttttgccacc<br>aagaagttggactaaagtttatatctgtcttataataattaccttatag<br>tcaacttcactccGTAATACGACTCACTATAGGG – 3' <sup>†</sup>  |
| CDC24-Long-Tet-R             | 5'gactgggcccagagaacaattcttgaagacgaaacagtactt<br>actgaattcaaagatgaagttgattgggtgaaaatgttctgagagct<br>gctggtgatgttccatggtttggactAGTTTTCTGAGATAAAGCTG – 3' <sup>†</sup> |
| URA3-R2                      | 5'-cttagtggtgactgtcatatc – 3'                                                                                                                                       |
| URA3-R3                      | 5'-ttataccatccaaatcaattc-3'                                                                                                                                         |
| URA3-OK-F2                   | 5'-agcactggaactgatattatc-3'                                                                                                                                         |
| CDC24-Seq-Up-F               | 5'-ggaagagtttatatctcgag – 3'                                                                                                                                        |
| CDC24-Seq-Down-F             | 5'-atcgacagaattgtcagagc-3'                                                                                                                                          |
| CDC24-WT-Prom-F              | 5'- ttgctgcatattgaagaaatag – 3'                                                                                                                                     |
| CDC24-Recom-R2               | 5'-ctgtaattgaatagataatcc – 3'                                                                                                                                       |
| Tet-Screen-F                 | 5'-ggacttctcgccagagg – 3'                                                                                                                                           |
| CDC24-Probe-R                | 5'-acaattctgtcgatttgaa g – 3'                                                                                                                                       |
| EFB1 forward                 | 5'-aagtccaatctatcaagtcattgaa c-3'                                                                                                                                   |
| EFB1 reverse                 | 5'-gagtgccagtagtaccatcaatg -3'                                                                                                                                      |
| Primer set A probe 1 forward | 5'-agcggctcattcactttgag-3'                                                                                                                                          |
| Primer set A probe 1 reverse | 5'-cacgtaaacactttcccattg-3'                                                                                                                                         |
| Primer set B forward 2       | 5'-aattatctcccagattatcacttcg-3'                                                                                                                                     |
| Primer set B reverse 2A      | 5'-gtctctctgctgtctttat-3'                                                                                                                                           |
| Primer set C forward 2       | 5'-aattatctcccagattatcacttcg-3'                                                                                                                                     |
| Primer set C reverse 2B      | 5'-caaaagctccttcgtagctt -3'                                                                                                                                         |
| Primer set D ACT1 forward    | 5'-accaccggtattgttttga -3'                                                                                                                                          |
| Primer set D ACT1 reverse    | 5'-agcgtaaattggaacaacgtg-3'                                                                                                                                         |

\*Uppercase denotes restriction enzyme site.

<sup>†</sup>Uppercase denotes homology to Tet promoter sequence.

**Table S3. Plasmids generated in this study**

| pBS-URA3 | pBluescript-URA3*                                |
|----------|--------------------------------------------------|
| ABp26    | TOPO-CDC24-ORF+200bp                             |
| ABp33    | TOPO- CDC24-t500bp                               |
| ABp63    | pBS-URA3+CDC24 + t200 bp inserted 3' to URA3     |
| ABp71    | ABp63 + t500 bpCDC24 inserted 5' to URA3         |
| ABp82    | ABP71 with CDC24 point mutations D802A and D806A |
| ABp99    | ABp82 with CDC24 point mutation D813A            |

\*A gift from Carol Munro (University of Aberdeen, Aberdeen, UK).
